# Supplementary material for: The reaction of formaldehyde carbonyl oxide with the methyl peroxy radical and its relevance in the chemistry of the atmosphere
Source: Royal Society of Chemistry journal article supplement (doi:10.1039/c3cp53100g), 2013-01-01
Supplement: c3cp53100g.pdf [file c3cp53100g.pdf]

## **The Reactions of Formaldehyde Carbonyl Oxide with Methyl Peroxy Radical and Their Relevance in the Chemistry of the Atmosphere.**

Josep M. Anglada,<sup>\*a</sup> Santiago Olivella<sup>a</sup> and Albert Solé<sup>b</sup>

- a) Departament de Química Biològica i Modelització Molecular, (IQAC – CSIC),  
Jordi Girona, 18-26, E-08034 Barcelona, Catalonia, Spain.
  
- b) Departament de Química Física i Institut de Química Teòrica i Computacional  
(IQTUB). Universitat de Barcelona, Martí i Franqués, 1, E-08028 Barcelona,  
Catalonia, Spain

E-mail: [anglada@iqac.csic.es](mailto:anglada@iqac.csic.es)

**(Electronic Supplementary Information)**

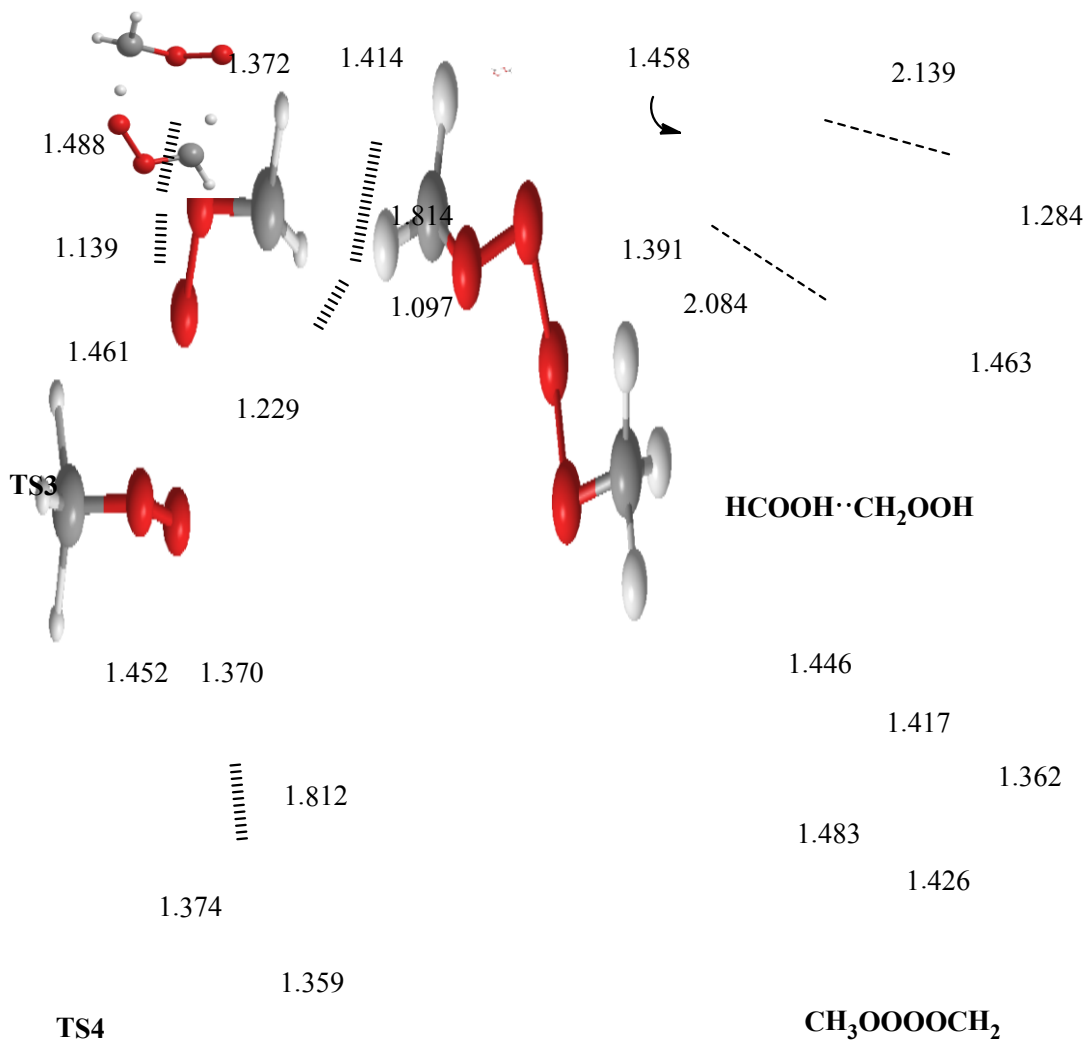

**Figure S1:** Main geometrical parameters (distances in Angstrom) for some stationary points obtained at CASSCF(13,13)/6-311+G(2df,2p) level of theory.

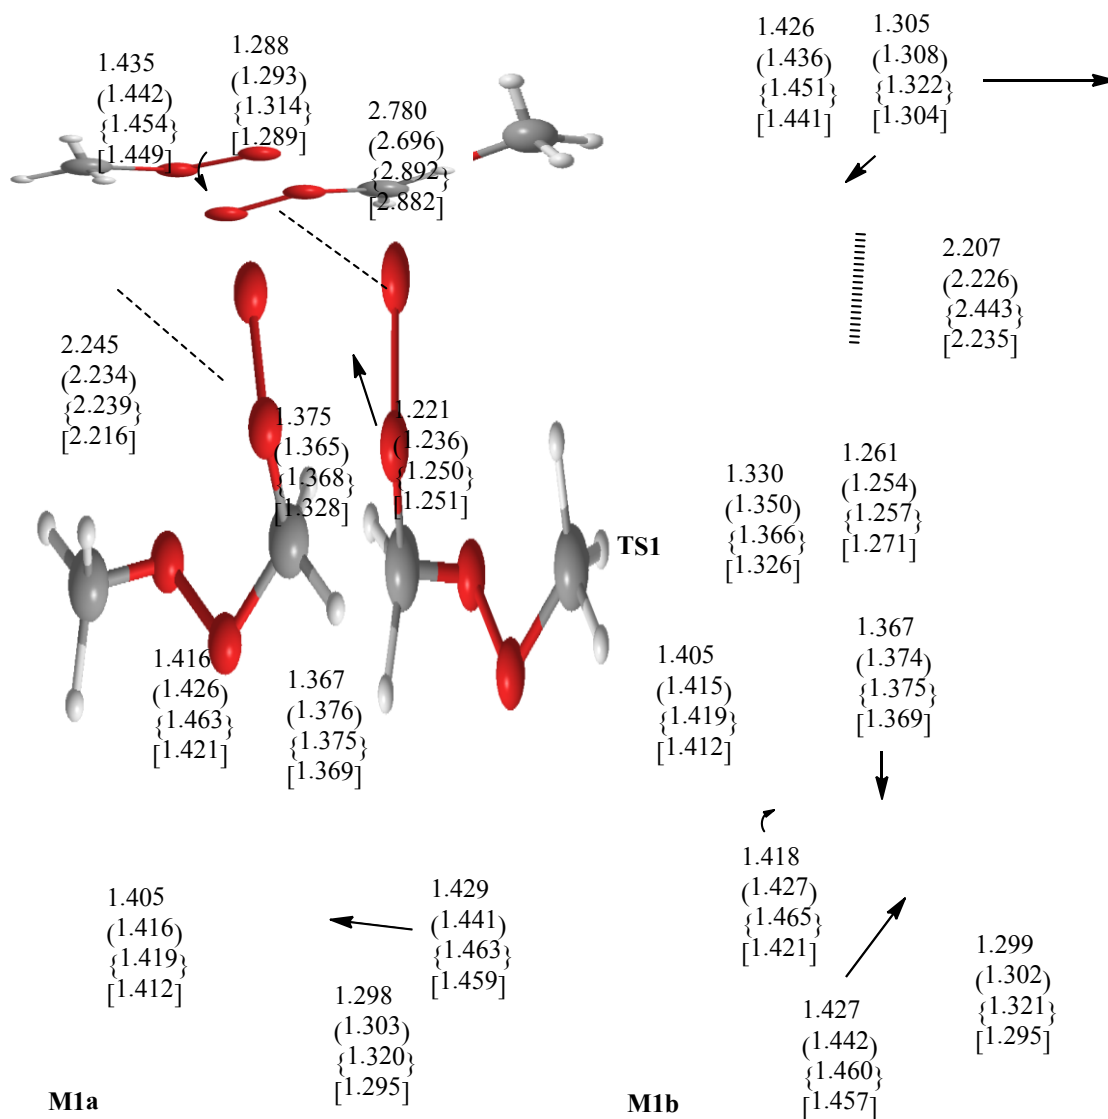

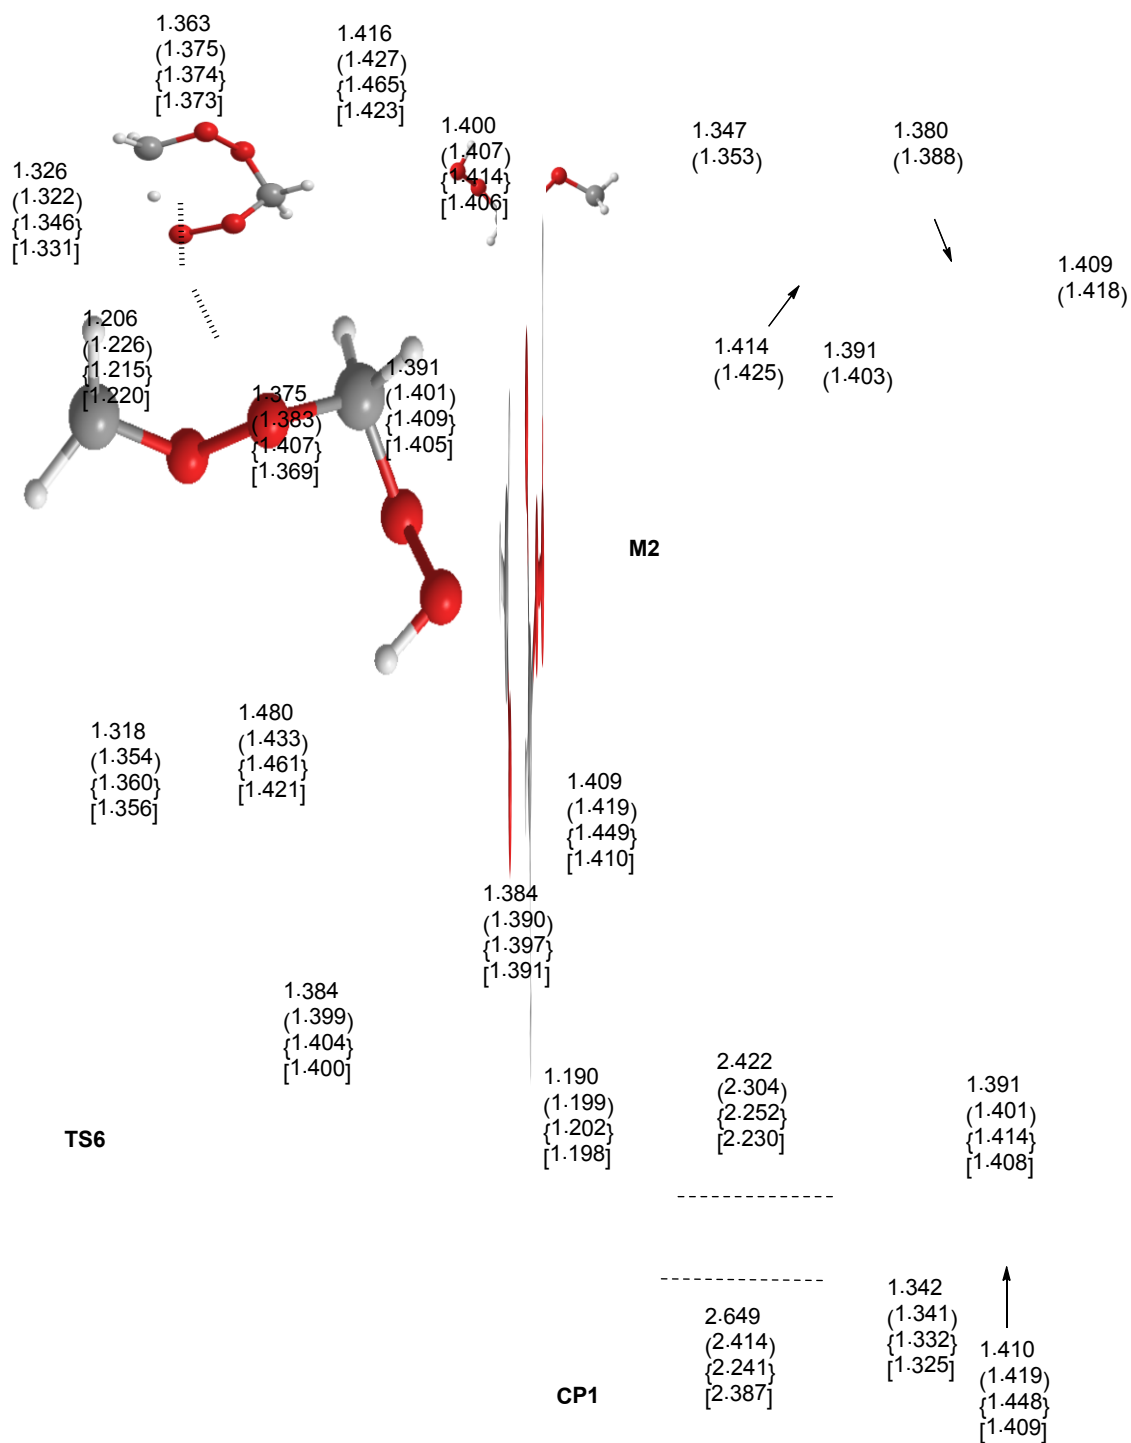

**Figure S2:** Main geometrical parameters (distances in Angstrom) for some stationary points obtained at BH&HLYP (plain text), M06-2X (in parenthesis), B3LYP (in braces), and M05 in brackets.

**Table S1:** Single point energies (in hartree) for the optimized energie at multireference levels of theory.

| Compound                           | Optimization        | CASSCF/                      | CASSCF/                  | CASPT2/                  | CCSD(T)/                 |
|------------------------------------|---------------------|------------------------------|--------------------------|--------------------------|--------------------------|
|                                    | Method <sup>a</sup> | 6-311+G(2df,2p) <sup>b</sup> | Aug-cc-pVTZ <sup>c</sup> | Aug-cc-pVTZ <sup>d</sup> | Aug-cc-pVTZ <sup>e</sup> |
| H <sub>2</sub> COO                 | A                   | -188.768498                  | -188.7765984             | -189.296789              | -189.3317084             |
| CH <sub>3</sub> OO                 | A                   | -189.353421                  | -189.3615145             | -189.920446              | -189.9608154             |
| CR1                                | A                   | -378.130100                  | -378.141944              | -379.224026              | --                       |
| CR1                                | B                   | --                           | -378.1395944             | -379.227669              | --                       |
| CR1                                | C                   | --                           | -378.1401056             | -379.227201              | -379.3033541             |
| TS1                                | A                   | -378.111087                  | -378.1278026             | -379.22211               | -379.2903932             |
| M1a                                | A                   | -378.200826                  | -378.1976294             | -379.295884              | -379.3717808             |
| CR2                                | A                   | -378.130052                  | --                       | --                       | --                       |
| CR2                                | C                   | --                           | -378.1398968             | -379.226854              | --                       |
| TS2                                | A                   | -378.110122                  | -378.1255316             | -379.218107              | --                       |
| M1b                                | A                   | -378.201936                  | -378.1991821             | -379.29658               | -379.37248               |
| TS4                                | A                   | -378.091338                  | -378.0990598             | -379.194322              | --                       |
| CH <sub>3</sub> OOOCH <sub>2</sub> | A                   | -378.095529                  | -378.1013376             | -379.196981              | --                       |
| TS5                                | A                   | -378.105309                  | -378.1193405             | -379.257354              | -379.3303606             |
| M2                                 | A                   | -378.170893                  | -378.1673363             | -379.281428              | -379.3550257             |
| TS6                                | A                   | -378.168637                  | -378.1656472             | -379.281574              | -379.3543071             |
| CP1                                | A                   | -378.258625                  | -378.2494452             | -379.340407              | -379.4172187             |

|                                  |   |             |              |             |              |
|----------------------------------|---|-------------|--------------|-------------|--------------|
| <b>TS3</b>                       | A | -378.028662 | -378.031865  | -379.169377 | --           |
| <b>HC(OOH)·CH<sub>2</sub>OOH</b> | A | -378.103162 | -378.096316  | -379.191542 | --           |
| <b>H<sub>2</sub>CO</b>           | A | -113.987619 | -114.0445231 | -114.316512 | -114.3426329 |
| <b>M3</b>                        | A | -264.300071 | -264.3040702 | -265.021503 | -265.0698667 |

- A stands for optimized geometry at CASSCF(13,13)/6-311+G(2df,2p); B stands for optimized geometry at CASPT2 (13,13)/6-311+G(2df,2p); C stands for optimized geometry at QCISD/6-311+G(2df,2p).
- Single point CASSCF(n,m)/6-311+G(2df,2p) energies at optimized geometries. (n,m) stands for (13,13) for all stationary points except H<sub>2</sub>COO(12,9); CH<sub>3</sub>OO (7,6); H<sub>2</sub>CO(8,6) and M3(11,11).
- Single point CASSCF(n,m)/aug-cc-pVTZ energies at optimized geometries. (n,m) stands for (19,15) for all stationary points except H<sub>2</sub>COO(12,9); CH<sub>3</sub>OO (7,6); H<sub>2</sub>CO(8,6) and M3(11,11).
- Single point CASPT2 energies over a CASSCF(n,m)/aug-cc-pVTZ wave function at optimized geometries. (n,m) stands for (19,15) for all stationary points except H<sub>2</sub>COO(12,9); CH<sub>3</sub>OO (7,6); H<sub>2</sub>CO(8,6) and M3(11,11).
- Single point UCCSD(T)/aug-cc-pVTZ energies at optimized geometries.

**Table S2:** Optimized energies (in hartree), obtained using different DFT functional and the aug-cc-pVTZ basis set.

| Compound               | B3LYP       | BH&HLYP     | M05        | M06-2X      |
|------------------------|-------------|-------------|------------|-------------|
| H <sub>2</sub> COO     | -189.662593 | -189.544386 | -189.55434 | -189.57546  |
| CH <sub>3</sub> OO     | -190.297724 | -190.18894  | -190.18409 | -190.20980  |
| CR1                    | -379.967665 | -379.742398 | -379.74746 | -379.797318 |
| TS1                    | -379.966319 | -379.737782 | -379.74562 | -379.795947 |
| M1a                    | 380.031236  | -379.817766 | -379.81170 | -379.872819 |
| M1b                    | -380.031642 | -379.818543 | -379.81217 | -379.873252 |
| TS5                    | -379.991812 | -379.767371 | -379.76652 | -379.83152  |
| M2                     | (a)         | -379.797775 | (b)        | -379.857679 |
| TS6                    | (a)         | -379.796765 | -379.79088 | -379.854713 |
| CP1                    | -380.080102 | -379.871041 | -379.86603 | -379.918754 |
| H <sub>2</sub> CO      | -114.552147 | -114.484475 | -114.48187 | -114.498984 |
| CH <sub>2</sub> (O)OOH | -265.523587 | -265.382199 | -265.37828 | -265.413911 |

a) These species are not found at B3LYP level of theory.

b) Any attempt to optimize M2 leads to a stationary point having an imaginary frequency which involves a rotation of the CH<sub>2</sub> terminal group.

**Table S3:** Cartesian coordinates (in Angstrom) for the stationary points optimized in this work using the 6-311+G(2df,2p) basis set.

**H<sub>2</sub>COO** CASSCF(12,9)

|   |              |               |              |
|---|--------------|---------------|--------------|
| O | 0.0017462527 | -0.0009008537 | 0.0000000000 |
| O | 1.3586946040 | 0.0032534366  | 0.0000000000 |
| C | 1.9517820216 | 1.1341608270  | 0.0000000000 |
| H | 1.3731490947 | 2.0337964372  | 0.0000000000 |
| H | 3.0191280269 | 1.0802701528  | 0.0000000000 |

**CH<sub>3</sub>OO** CASSCF(7,6)

|   |           |           |           |
|---|-----------|-----------|-----------|
| O | -1.215903 | 0.043287  | 0.000000  |
| O | 0.007789  | 0.582625  | 0.000000  |
| C | 1.001751  | -0.481318 | 0.000000  |
| H | 1.953862  | 0.024593  | 0.000000  |
| H | 0.880196  | -1.077971 | 0.889022  |
| H | 0.880196  | -1.077971 | -0.889022 |

**H<sub>2</sub>CO** CASSCF(8,6)

|   |               |               |               |
|---|---------------|---------------|---------------|
| C | 0.5403033440  | -0.0000073769 | 0.0000007508  |
| O | -0.6752665941 | 0.0000908180  | 0.0000702016  |
| H | 1.1056482513  | 0.9287083947  | 0.0006941032  |
| H | 1.1055509987  | -0.9287918359 | -0.0007650556 |

**M3 (CH<sub>2</sub>(O)OOH)** CASSCF(11,11)

|   |     |               |               |               |
|---|-----|---------------|---------------|---------------|
| C | 6.0 | 0.7037627367  | 0.4765988195  | 0.2505290269  |
| O | 8.0 | 1.3740559720  | -0.6745767700 | -0.1532632234 |
| H | 1.0 | 0.6104336458  | 0.4261448316  | 1.3266967550  |
| H | 1.0 | 1.2720874029  | 1.3419364553  | -0.0603146915 |
| O | 8.0 | -0.5644191811 | 0.6415780736  | -0.3578957294 |
| O | 8.0 | -1.4287299975 | -0.3828863582 | 0.2154890358  |
| H | 1.0 | -1.3840125788 | -1.0550250519 | -0.4797001733 |

**CR1 CASPT2(13,13)**

|   |           |           |           |
|---|-----------|-----------|-----------|
| C | -1.710647 | -1.179668 | -0.119330 |
| O | -1.879116 | 0.005543  | 0.309569  |
| H | -2.081258 | -1.949634 | 0.534366  |
| H | -1.219493 | -1.330407 | -1.066619 |
| O | 1.092093  | -1.024576 | 0.243755  |
| O | 1.779357  | -0.107367 | -0.406370 |
| C | 1.709375  | 1.157906  | 0.290682  |
| O | -1.430709 | 1.018748  | -0.445273 |
| H | 2.347489  | 1.826099  | -0.275020 |
| H | 0.678604  | 1.493818  | 0.285016  |
| H | 2.083994  | 1.017630  | 1.298625  |

**CR1 CASSCF(13,13)**

|   |     |               |               |               |
|---|-----|---------------|---------------|---------------|
| C | 6.0 | -1.8442203502 | -1.1666690374 | -0.1171531515 |
| O | 8.0 | -2.1354761002 | -0.0465999168 | 0.3431265624  |
| H | 1.0 | -2.1831217277 | -2.0025666444 | 0.4578428714  |
| H | 1.0 | -1.2818205431 | -1.2368058176 | -1.0247337908 |
| O | 8.0 | 1.3417606486  | -1.0796331963 | 0.2382248145  |
| O | 8.0 | 2.1080881458  | -0.1390831024 | -0.3319640598 |
| C | 6.0 | 1.8089359697  | 1.1627057901  | 0.2665340286  |
| O | 8.0 | -1.7179656087 | 1.0595125730  | -0.3505089072 |
| H | 1.0 | 2.4452179902  | 1.8543556421  | -0.2618442921 |
| H | 1.0 | 0.7675216153  | 1.3913470889  | 0.1152671850  |
| H | 1.0 | 2.0607699602  | 1.1315286207  | 1.3146107396  |

**CR1 QCISD**

|      |           |           |           |
|------|-----------|-----------|-----------|
| C 6. | -1.749654 | -0.927750 | -0.146433 |
| O 8. | -1.850841 | 0.206730  | 0.389502  |
| H 1. | -2.146262 | -1.749140 | 0.431335  |
| H 1. | -1.283146 | -1.013346 | -1.117765 |
| O 8. | 1.027870  | -1.201268 | 0.219745  |
| O 8. | 1.802403  | -0.359371 | -0.437817 |
| C 6. | 1.861066  | 0.910609  | 0.246921  |
| O 8. | -1.341407 | 1.261508  | -0.307589 |
| H 1. | 2.537094  | 1.519709  | -0.346108 |
| H 1. | 0.862207  | 1.337178  | 0.273203  |
| H 1. | 2.257435  | 0.747654  | 1.245680  |

**TS1 CASSCF(13,13)**

|   |              |               |              |
|---|--------------|---------------|--------------|
| C | 1.4250392959 | 0.8880814085  | 0.0215722187 |
| O | 1.5535871453 | -0.3222869923 | 0.5132320513 |



|   |               |               |               |
|---|---------------|---------------|---------------|
| H | 1.6307912289  | 1.6592620027  | 0.7295740848  |
| H | 1.4289739096  | 1.0106031726  | -1.0382961154 |
| O | -0.7913350642 | 1.3213215074  | 0.0674587668  |
| O | -1.3302071550 | 0.2300538937  | -0.6008196078 |
| C | -1.8919387191 | -0.6731239136 | 0.3811333430  |
| O | 1.5028366233  | -1.3317742170 | -0.3730415592 |
| H | -2.2812068015 | -1.4947439216 | -0.1991503192 |
| H | -1.1240106055 | -1.0190576797 | 1.0538304688  |
| H | -2.6869858576 | -0.1802352606 | 0.9206096683  |

**M1a** CASSCF(13,13)

|   |               |               |               |
|---|---------------|---------------|---------------|
| C | -0.8345830094 | 0.9846927174  | 0.1063398171  |
| O | -1.4836591317 | -0.1397509383 | -0.5314359885 |
| H | -1.2544980011 | 1.8656215896  | -0.3497046717 |
| H | -1.0046052613 | 0.9251723902  | 1.1654103804  |
| O | 0.5300754879  | 1.0304435901  | -0.2065206202 |
| O | 1.1678586663  | -0.0025812731 | 0.6211807857  |
| C | 1.9902758757  | -0.7566172024 | -0.2848615145 |
| O | -1.7315293307 | -1.1123957696 | 0.3695971874  |
| H | 2.4832462893  | -1.4840097116 | 0.3426549937  |
| H | 1.3817143575  | -1.2488389451 | -1.0288019496 |
| H | 2.7187430576  | -0.1114004471 | -0.7536064198 |

**CR2** CASSCF(13,13)

|   |           |           |           |
|---|-----------|-----------|-----------|
| C | 1.844136  | -1.088432 | 0.261868  |
| O | 2.041324  | -0.064299 | -0.419229 |
| H | 2.086949  | -2.013371 | -0.217516 |
| H | 1.444121  | -0.997613 | 1.249964  |
| O | -1.380718 | -1.095933 | 0.356875  |
| O | -2.084303 | -0.210310 | -0.362282 |
| C | -1.853619 | 1.137554  | 0.160058  |
| O | 1.738182  | 1.148179  | 0.143857  |
| H | -2.217161 | 1.186129  | 1.174050  |
| H | -0.802663 | 1.365791  | 0.104631  |
| H | -2.430447 | 1.778826  | -0.486643 |

**CR2** QCISD

|   |           |           |           |
|---|-----------|-----------|-----------|
| C | 1.614080  | -0.988409 | 0.299781  |
| O | 1.801437  | -0.004022 | -0.461157 |
| H | 1.743577  | -1.958183 | -0.156709 |
| H | 1.337995  | -0.813613 | 1.329878  |
| O | -1.210495 | -1.187580 | 0.122297  |
| O | -1.955096 | -0.234872 | -0.404182 |
| C | -1.664536 | 1.038295  | 0.214330  |
| O | 1.621140  | 1.235262  | 0.079948  |
| H | -1.962072 | 0.990354  | 1.259052  |
| H | -0.603069 | 1.252373  | 0.115085  |
| H | -2.269574 | 1.759444  | -0.327222 |

**TS2** CASSCF(13,13)

|   |           |           |           |
|---|-----------|-----------|-----------|
| C | 1.151493  | -0.997849 | -0.332771 |
| O | 1.538697  | 0.238008  | -0.573019 |
| H | 0.737481  | -1.484586 | -1.186648 |
| H | 1.546175  | -1.495959 | 0.524871  |
| O | -0.876787 | -0.879549 | 0.644492  |
| O | -1.768247 | -0.395825 | -0.309423 |
| C | -1.928103 | 1.027316  | -0.096717 |
| O | 2.248502  | 0.838844  | 0.393508  |
| H | -2.317166 | 1.210515  | 0.893060  |
| H | -0.987156 | 1.535052  | -0.237773 |
| H | -2.642132 | 1.334364  | -0.845192 |

**M1b** CASSCF(13,13)

|   |               |               |               |
|---|---------------|---------------|---------------|
| C | 0.7815734179  | -0.9732492840 | -0.0577756901 |
| O | 1.3834438034  | 0.1981905419  | -0.6503817884 |
| H | 0.5836124082  | -1.6271188231 | -0.8890485397 |
| H | 1.4581469267  | -1.3921600431 | 0.6658050987  |
| O | -0.3910953350 | -0.6723190172 | 0.6458875774  |
| O | -1.4058149708 | -0.3884289813 | -0.3797771130 |
| C | -2.0115108997 | 0.8516581980  | 0.0221710958  |
| O | 1.9939903738  | 0.9207304885  | 0.3127012225  |
| H | -2.4462843746 | 0.7529727243  | 1.0057911914  |
| H | -1.2859567440 | 1.6508526915  | 0.0035546408  |
| H | -2.7838226059 | 1.0236875044  | -0.7126126955 |

**TS4** CASSCF(13,13)

|   |               |               |               |
|---|---------------|---------------|---------------|
| C | -2.2982550747 | 0.1652908748  | -0.1575183873 |
| O | -1.1947325923 | -0.7719378192 | -0.0533474064 |
| O | -0.5609889432 | -0.5653461781 | 1.1434550404  |
| O | 0.6148512551  | 0.7888702685  | 0.8882007516  |
| O | 1.2523209885  | 0.5334038415  | -0.3016422266 |
| C | 2.2564190637  | -0.3675011973 | -0.1377226212 |
| H | -1.9151216418 | 1.1735799702  | -0.1787969632 |
| H | -2.7779296369 | -0.0825581496 | -1.0911535806 |
| H | -2.9746894009 | 0.0260389177  | 0.6715659897  |
| H | 2.6818374598  | -0.4336750518 | 0.8415070421  |
| H | 2.8475475226  | -0.4545354767 | -1.0253496385 |

**CH<sub>3</sub>OOOCH<sub>2</sub>** CASSCF(13,13)

|   |               |               |               |
|---|---------------|---------------|---------------|
| C | -2.4729695502 | 0.2190707065  | -0.0449772133 |
| O | -1.3650117463 | -0.6374724075 | -0.4060757569 |
| O | -0.4443976888 | -0.6196197534 | 0.6706717942  |
| O | 0.4316891284  | 0.5594404057  | 0.4676082653  |
| O | 1.3863895945  | 0.1922083065  | -0.5254838959 |
| C | 2.4139381174  | -0.4751409837 | 0.0691818092  |
| H | -2.1406503073 | 1.2418736004  | 0.0527557267  |
| H | -3.1602314193 | 0.1248628447  | -0.8711857383 |
| H | -2.9292972995 | -0.1272815830 | 0.8705289164  |
| H | 2.6924490384  | -0.1452816227 | 1.0504300913  |
| H | 3.1573761329  | -0.7379175135 | -0.6556779987 |

**TS3** CASSCF(13,13)

|   |               |               |               |
|---|---------------|---------------|---------------|
| C | -0.1534984605 | -0.1123435848 | 0.0208288548  |
| O | 0.1348823184  | -0.1077673988 | 1.3620173775  |
| H | 0.7256440093  | -0.1335489583 | -0.6024867311 |
| H | -0.9120420672 | -0.8514196967 | -0.1781947728 |
| O | 1.3134660246  | 0.6190184583  | 1.6469055488  |
| H | 0.3135501110  | 2.1254744056  | 1.7986456327  |
| C | -0.6736001622 | 2.5891036961  | 1.9216804860  |
| O | -1.4461068829 | 2.7549653970  | 0.9806221440  |
| H | -1.0829640073 | 2.8887787292  | 2.8709382600  |
| O | -0.8957462179 | 2.3785952969  | -0.3190821794 |
| H | -0.6536754249 | 1.2712654684  | -0.2021862494 |

**HC(OOH)···CH<sub>2</sub>OOH** CASSCF(13,13)

|   |               |               |               |
|---|---------------|---------------|---------------|
| C | 0.5587445792  | -0.3837149071 | -0.3287030739 |
| O | -0.2592258371 | -0.0724355990 | 0.7518571701  |
| H | 1.5179700320  | -0.7902873695 | -0.0810598996 |
| H | -0.0254362235 | -0.7943651600 | -1.1286300826 |
| O | 0.6041391392  | 0.2818732876  | 1.8721554845  |
| H | 0.3728206895  | 1.2055810175  | 1.9657401132  |
| C | -0.5736874302 | 3.1157394323  | 1.7935328495  |
| O | -1.6325268581 | 3.3938420799  | 1.1229885314  |
| H | -0.3159844061 | 4.0767154756  | 2.2412084583  |
| O | -2.1904362161 | 2.2415676460  | 0.4147888556  |
| H | -1.5402824688 | 1.5634460966  | 0.5876375935  |

**TS5** CASCF(13,13)

|   |               |               |               |
|---|---------------|---------------|---------------|
| C | 0.8896001088  | -1.0224034338 | 0.2269142309  |
| O | -0.4529411119 | -0.9469179914 | 0.7389334641  |
| O | 1.2647836250  | 0.1085054209  | -0.4595579075 |
| O | 1.0493700514  | 1.2501811093  | 0.3632130515  |
| H | 1.4785707949  | -1.1940663903 | 1.1163618605  |
| H | 0.9796812300  | -1.8253345280 | -0.4878359453 |
| O | -1.2571904959 | -0.3286562869 | -0.3116020420 |
| C | -1.3687769604 | 1.0075507359  | 0.0815146614  |
| H | -1.7714322637 | 1.1360231761  | 1.0740503915  |
| H | -1.8636330779 | 1.5519264976  | -0.7040196291 |
| H | -0.1326408923 | 1.4031726646  | 0.2058564460  |

**M2** CASSCF(13,13)

|   |               |               |               |
|---|---------------|---------------|---------------|
| C | 0.8332920057  | -0.9132408702 | 0.1959645727  |
| O | -0.3983560251 | -0.5851838440 | 0.8182181042  |
| O | 1.4196483509  | 0.1674750476  | -0.4887426924 |
| O | 1.8653534797  | 1.1147252458  | 0.5371373626  |
| H | 1.4597633325  | -1.2438824100 | 1.0077414208  |
| H | 0.6870945950  | -1.6729801152 | -0.5538249343 |
| O | -1.3613874123 | -0.4000381487 | -0.2645476518 |
| C | -1.9455619126 | 0.8437174774  | -0.0783788338 |
| H | -2.0833845083 | 1.1503474295  | 0.9399942278  |

|   |               |              |               |
|---|---------------|--------------|---------------|
| H | -2.7186875497 | 0.9953129272 | -0.8049093900 |
| H | 1.2000946588  | 1.7799226903 | 0.4572293091  |

**TS6** CASSCF(13,13)

|   |               |               |               |
|---|---------------|---------------|---------------|
| C | -0.6065124747 | 0.9351565989  | 0.0427607142  |
| O | 0.4710087634  | 0.2390878065  | 0.6428421256  |
| O | -1.4921159570 | 0.0902725769  | -0.6549723627 |
| O | -2.1816829278 | -0.7120482910 | 0.3580571037  |
| H | -1.1058266169 | 1.4175758160  | 0.8672176826  |
| H | -0.2466898502 | 1.6328209875  | -0.6950716706 |
| O | 1.3442562277  | -0.2011474863 | -0.5021221152 |
| C | 2.6266195663  | -0.2771816867 | -0.0280111461 |
| H | 2.8954584645  | 0.3836748466  | 0.7676330807  |
| H | 3.1233634622  | -1.2123887176 | -0.1920962825 |
| H | -1.6831130824 | -1.5127378084 | 0.3150084014  |

**CP1** CASSCF(13,13)

|   |               |               |               |
|---|---------------|---------------|---------------|
| C | -0.7469097026 | 0.4313990078  | -0.0016838687 |
| O | -0.1613561140 | -0.3648073736 | 0.9768635806  |
| O | -1.9833515931 | -0.0730465638 | -0.4688166506 |
| O | -2.9289301560 | 0.0922961826  | 0.6398526112  |
| H | -0.8727140123 | 1.4203689826  | 0.4160496466  |
| H | -0.0978426477 | 0.4462562032  | -0.8650527804 |
| O | 2.6070711648  | 0.3587917510  | -1.1318688215 |
| C | 3.2535596106  | -0.0711220204 | -0.2007317463 |
| H | 2.7823091847  | -0.3833630474 | 0.7326994467  |
| H | 4.3406436945  | -0.1661340748 | -0.2522968904 |
| H | -2.9798320927 | -0.7957203295 | 0.9560637948  |

**Table S4:** Cartesian coordinates (in Amstrongs) for the optimizes stationary points using density functional methods.

**Optimized at B3LYP/aug-cc-pVTZ**

**H<sub>2</sub>COO**

|   |           |           |          |
|---|-----------|-----------|----------|
| O | -1.177922 | -0.202791 | 0.000000 |
| O | 0.000000  | 0.458950  | 0.000000 |
| C | 1.069980  | -0.194863 | 0.000000 |
| H | 1.029606  | -1.277362 | 0.000000 |
| H | 1.973891  | 0.397261  | 0.000000 |

**CH<sub>3</sub>OO**

|   |           |           |           |
|---|-----------|-----------|-----------|
| O | -1.217582 | 0.061370  | 0.000000  |
| O | 0.000000  | 0.564641  | 0.000000  |
| C | 1.002457  | -0.479057 | 0.000000  |
| H | 1.959417  | 0.036976  | 0.000000  |
| H | 0.883249  | -1.085362 | 0.895426  |
| H | 0.883249  | -1.085362 | -0.895426 |

**CR1**

|   |           |           |           |
|---|-----------|-----------|-----------|
| C | -1.634106 | -1.054025 | -0.045351 |
|---|-----------|-----------|-----------|

|   |           |           |           |
|---|-----------|-----------|-----------|
| O | -1.926802 | 0.078605  | 0.394125  |
| H | -1.887469 | -1.882959 | 0.601049  |
| H | -1.163184 | -1.150035 | -1.014449 |
| O | 1.255186  | -1.184762 | -0.009026 |
| O | 2.098581  | -0.208865 | -0.259431 |
| C | 1.628547  | 1.069063  | 0.250494  |
| O | -1.610744 | 1.172332  | -0.364006 |
| H | 2.326697  | 1.801895  | -0.145507 |
| H | 0.610736  | 1.245892  | -0.096450 |
| H | 1.672249  | 1.040951  | 1.337955  |

### TS1

|   |           |           |           |
|---|-----------|-----------|-----------|
| C | 1.581577  | 0.915080  | -0.013026 |
| O | 1.646267  | -0.188872 | 0.584005  |
| H | 1.789803  | 1.784160  | 0.593675  |
| H | 1.395835  | 0.936442  | -1.077689 |
| O | -0.828543 | 1.274639  | 0.162280  |
| O | -1.384244 | 0.295444  | -0.531264 |
| C | -1.941528 | -0.723345 | 0.338257  |
| O | 1.393127  | -1.319129 | -0.139760 |
| H | -2.424448 | -1.430608 | -0.330629 |
| H | -1.131523 | -1.199583 | 0.883184  |
| H | -2.660779 | -0.256127 | 1.007072  |

### M1a

|   |           |           |           |
|---|-----------|-----------|-----------|
| C | -0.810237 | 0.967785  | 0.115344  |
| O | -1.458906 | -0.169746 | -0.537662 |
| H | -1.254295 | 1.862806  | -0.319753 |
| H | -0.993312 | 0.864018  | 1.182946  |
| O | 0.523765  | 1.025325  | -0.211561 |
| O | 1.213039  | 0.027406  | 0.605918  |
| C | 2.008208  | -0.741151 | -0.283923 |
| O | -1.919127 | -1.047427 | 0.334530  |
| H | 2.534099  | -1.438000 | 0.368436  |
| H | 1.390307  | -1.288832 | -0.996418 |
| H | 2.729498  | -0.111847 | -0.807606 |

### M1b

|   |           |           |           |
|---|-----------|-----------|-----------|
| C | 0.891416  | -0.954800 | 0.236684  |
| O | -0.271481 | -0.510760 | 0.820155  |
| O | 1.661111  | 0.121278  | -0.380401 |
| O | 2.274742  | 0.851215  | 0.533771  |
| H | 1.491727  | -1.377510 | 1.039701  |
| H | 0.706486  | -1.649123 | -0.581938 |
| O | -1.225312 | -0.261713 | -0.263599 |
| C | -1.823026 | 0.994091  | 0.016735  |
| H | -2.334266 | 0.978352  | 0.980597  |
| H | -2.551904 | 1.124053  | -0.783090 |
| H | -1.087549 | 1.798961  | -0.011282 |

### TS5

|   |           |           |           |
|---|-----------|-----------|-----------|
| C | 0.879115  | -1.032328 | 0.235644  |
| O | -0.432354 | -0.930016 | 0.753956  |
| O | 1.293996  | 0.126817  | -0.447129 |
| O | 1.075744  | 1.261580  | 0.360232  |
| H | 1.479130  | -1.242628 | 1.125252  |
| H | 0.964915  | -1.817275 | -0.518557 |
| O | -1.249488 | -0.317389 | -0.295928 |
| C | -1.393242 | 0.999513  | 0.071838  |
| H | -1.784252 | 1.146958  | 1.078562  |
| H | -1.902087 | 1.527411  | -0.729833 |
| H | -0.116086 | 1.417339  | 0.209790  |

### CP1

|   |           |           |           |
|---|-----------|-----------|-----------|
| C | -0.543178 | 0.664503  | 0.124918  |
| O | 0.032909  | 0.221910  | 1.241497  |
| O | -1.465558 | -0.208114 | -0.497740 |
| O | -2.611409 | -0.334201 | 0.379328  |
| H | -1.028021 | 1.635670  | 0.342534  |
| H | 0.230306  | 0.849522  | -0.649707 |
| O | 2.385349  | 0.467768  | -1.178896 |
| C | 2.742030  | -0.216110 | -0.256959 |
| H | 2.060339  | -0.465987 | 0.578752  |
| H | 3.767343  | -0.621782 | -0.199733 |
| H | -2.357463 | -1.098259 | 0.917085  |

### H<sub>2</sub>CO

|   |          |           |           |
|---|----------|-----------|-----------|
| C | 0.000000 | 0.000000  | -0.527125 |
| O | 0.000000 | 0.000000  | 0.673102  |
| H | 0.000000 | 0.939180  | -1.111032 |
| H | 0.000000 | -0.939180 | -1.111032 |

### CH<sub>2</sub>(O)OOH

|   |           |           |           |
|---|-----------|-----------|-----------|
| C | 0.705111  | 0.446503  | 0.225992  |
| O | 1.346308  | -0.664769 | -0.136348 |
| H | 0.640272  | 0.432722  | 1.332446  |
| H | 1.273775  | 1.347562  | -0.060799 |
| O | -0.576657 | 0.653391  | -0.331737 |
| O | -1.452072 | -0.373685 | 0.190006  |
| H | -1.353558 | -1.067954 | -0.478019 |

### Optimized at BH&HLYP/aug-cc-pVTZ

### H<sub>2</sub>COO

|   |           |           |          |
|---|-----------|-----------|----------|
| O | -1.162741 | -0.235300 | 0.000000 |
| O | 0.000000  | 0.460664  | 0.000000 |
| C | 1.053343  | -0.163876 | 0.000000 |
| H | 1.026710  | -1.240566 | 0.000000 |
| H | 1.955161  | 0.420914  | 0.000000 |

### CH<sub>3</sub>OO

|   |           |           |           |
|---|-----------|-----------|-----------|
| O | -1.197529 | 0.067369  | 0.000000  |
| O | 0.000000  | 0.555844  | 0.000000  |
| C | 0.983868  | -0.475870 | 0.000000  |
| H | 1.937939  | 0.028978  | 0.000000  |
| H | 0.869541  | -1.079730 | 0.888509  |
| H | 0.869541  | -1.079730 | -0.888509 |

### CR1

|   |           |           |           |
|---|-----------|-----------|-----------|
| C | -1.644436 | -0.828730 | -0.046187 |
| O | -1.776589 | 0.274812  | 0.460398  |
| H | -1.889069 | -1.673857 | 0.572294  |
| H | -1.306308 | -0.909982 | -1.064069 |
| O | 1.094765  | -1.297422 | -0.123303 |
| O | 2.042324  | -0.451737 | -0.336338 |
| C | 1.760985  | 0.837655  | 0.226787  |
| O | -1.441735 | 1.366229  | -0.306233 |
| H | 2.544987  | 1.481982  | -0.140148 |
| H | 0.784822  | 1.172839  | -0.096632 |
| H | 1.807019  | 0.760724  | 1.304105  |

### TS1

|   |           |           |           |
|---|-----------|-----------|-----------|
| C | 1.433885  | 0.878973  | 0.041785  |
| O | 1.442919  | -0.302104 | 0.482957  |
| H | 1.599085  | 1.644169  | 0.772630  |
| H | 1.442796  | 1.036999  | -1.017961 |
| O | -0.740033 | 1.256146  | -0.009329 |
| O | -1.257744 | 0.200955  | -0.576423 |
| C | -1.838068 | -0.675217 | 0.387288  |
| O | 1.289331  | -1.278217 | -0.406755 |
| H | -2.212235 | -1.514768 | -0.177521 |
| H | -1.081815 | -0.998164 | 1.085576  |
| H | -2.642578 | -0.160672 | 0.893854  |

### M1a

|   |           |           |           |
|---|-----------|-----------|-----------|
| C | -0.800338 | 0.962618  | 0.108771  |
| O | -1.413634 | -0.158304 | -0.531733 |
| H | -1.236297 | 1.846785  | -0.334072 |
| H | -0.993804 | 0.876652  | 1.167956  |
| O | 0.534336  | 1.027269  | -0.179598 |
| O | 1.190892  | 0.046832  | 0.604086  |
| C | 1.957407  | -0.736385 | -0.275816 |
| O | -1.752202 | -1.084762 | 0.311973  |
| H | 2.471169  | -1.442361 | 0.362061  |
| H | 1.325816  | -1.262649 | -0.980270 |
| H | 2.679694  | -0.125359 | -0.803106 |

### M1b

|   |           |           |           |
|---|-----------|-----------|-----------|
| C | 0.871772  | -0.939814 | 0.224202  |
| O | -0.301933 | -0.562492 | 0.814606  |
| O | 1.568763  | 0.161024  | -0.356816 |

|   |           |           |           |
|---|-----------|-----------|-----------|
| O | 2.143389  | 0.888454  | 0.553540  |
| H | 1.484100  | -1.360538 | 1.007707  |
| H | 0.706699  | -1.621737 | -0.597811 |
| O | -1.236037 | -0.303471 | -0.220150 |
| C | -1.764380 | 0.977138  | 0.015921  |
| H | -2.242466 | 1.021819  | 0.986634  |
| H | -2.502281 | 1.117784  | -0.762013 |
| H | -0.995682 | 1.735876  | -0.058486 |

### TS5

|   |           |           |           |
|---|-----------|-----------|-----------|
| C | 0.866805  | -1.016801 | 0.232249  |
| O | -0.435198 | -0.916258 | 0.735284  |
| O | 1.269708  | 0.132286  | -0.437063 |
| O | 1.062242  | 1.238504  | 0.357634  |
| H | 1.466948  | -1.221871 | 1.111468  |
| H | 0.951317  | -1.799048 | -0.512018 |
| O | -1.232174 | -0.326789 | -0.274224 |
| C | -1.373156 | 0.986607  | 0.075175  |
| H | -1.771655 | 1.139978  | 1.068990  |
| H | -1.866560 | 1.513699  | -0.725276 |
| H | -0.122886 | 1.409672  | 0.211607  |

### M2

|   |           |           |           |
|---|-----------|-----------|-----------|
| C | 0.824072  | -0.892104 | 0.195035  |
| O | -0.391525 | -0.563829 | 0.786032  |
| O | 1.421895  | 0.159856  | -0.469220 |
| O | 1.858502  | 1.099186  | 0.486612  |
| H | 1.432955  | -1.232770 | 1.022440  |
| H | 0.691409  | -1.657558 | -0.558354 |
| O | -1.329190 | -0.368564 | -0.254135 |
| C | -1.947503 | 0.813877  | -0.068272 |
| H | -2.039232 | 1.165738  | 0.941123  |
| H | -2.708102 | 0.977978  | -0.805516 |
| H | 1.144587  | 1.734365  | 0.490138  |

### TS6

|   |           |           |           |
|---|-----------|-----------|-----------|
| C | -0.607350 | 0.907716  | 0.039944  |
| O | 0.447296  | 0.231509  | 0.628822  |
| O | -1.482500 | 0.083244  | -0.645022 |
| O | -2.185321 | -0.694254 | 0.296844  |
| H | -1.108697 | 1.398698  | 0.865349  |
| H | -0.253613 | 1.613710  | -0.700162 |
| O | 1.366017  | -0.156309 | -0.465268 |
| C | 2.577523  | -0.308754 | 0.027605  |
| H | 2.935540  | 0.389401  | 0.758342  |
| H | 3.099608  | -1.203473 | -0.249777 |
| H | -1.643736 | -1.478403 | 0.364570  |

### CP1

|   |           |          |          |
|---|-----------|----------|----------|
| C | -0.646610 | 0.410958 | 0.016168 |
|---|-----------|----------|----------|



|   |           |           |           |
|---|-----------|-----------|-----------|
| O | -0.082581 | -0.315569 | 0.993005  |
| O | -1.851524 | -0.089130 | -0.467554 |
| O | -2.820766 | 0.060165  | 0.544920  |
| H | -0.781683 | 1.424233  | 0.403383  |
| H | 0.027855  | 0.447708  | -0.839677 |
| O | 2.434703  | 0.397952  | -1.106029 |
| C | 3.047181  | -0.067692 | -0.197750 |
| H | 2.550433  | -0.402982 | 0.717051  |
| H | 4.135500  | -0.179397 | -0.239663 |
| H | -2.799860 | -0.791327 | 0.977224  |

### **H<sub>2</sub>CO**

|   |          |           |           |
|---|----------|-----------|-----------|
| C | 0.000000 | 0.000000  | -0.521398 |
| O | 0.000000 | 0.000000  | 0.666069  |
| H | 0.000000 | 0.930412  | -1.100085 |
| H | 0.000000 | -0.930412 | -1.100085 |

### **CH<sub>2</sub>(O)OOH**

|   |           |           |           |
|---|-----------|-----------|-----------|
| C | 0.694461  | 0.453254  | 0.232994  |
| O | 1.347891  | -0.653727 | -0.147826 |
| H | 0.615769  | 0.419175  | 1.322617  |
| H | 1.262300  | 1.338108  | -0.055346 |
| O | -0.561161 | 0.627981  | -0.340743 |
| O | -1.417938 | -0.356317 | 0.189609  |
| H | -1.358145 | -1.054703 | -0.459764 |

## **Optimized at M06-2X/aug-cc-pVTZ**

### **H<sub>2</sub>COO**

|   |           |           |          |
|---|-----------|-----------|----------|
| O | -1.161095 | -0.230328 | 0.000000 |
| O | -0.008760 | 0.460499  | 0.000000 |
| C | 1.059049  | -0.168076 | 0.000000 |
| H | 1.024426  | -1.251768 | 0.000000 |
| H | 1.958853  | 0.431510  | 0.000000 |

### **CH<sub>3</sub>OO**

|   |           |           |           |
|---|-----------|-----------|-----------|
| O | -1.201211 | 0.063156  | 0.000000  |
| O | -0.002839 | 0.560933  | 0.000000  |
| C | 0.988872  | -0.475947 | 0.000000  |
| H | 1.949410  | 0.031411  | 0.000000  |
| H | 0.864564  | -1.081346 | 0.894908  |
| H | 0.864564  | -1.081346 | -0.894908 |

### **CR1**

|   |           |           |           |
|---|-----------|-----------|-----------|
| C | -1.452329 | -0.730484 | -0.009358 |
| O | -1.615799 | 0.353969  | 0.560127  |
| H | -1.560709 | -1.615100 | 0.603962  |
| H | -1.228776 | -0.740067 | -1.069725 |
| O | 1.144416  | -1.438841 | -0.157394 |
| O | 2.068191  | -0.538603 | -0.245327 |

|   |           |          |           |
|---|-----------|----------|-----------|
| C | 1.594303  | 0.760566 | 0.163352  |
| O | -1.455670 | 1.487702 | -0.183213 |
| H | 2.425465  | 1.437713 | -0.007828 |
| H | 0.720028  | 1.039072 | -0.423987 |
| H | 1.337644  | 0.716585 | 1.220067  |

#### TS1

|   |           |           |           |
|---|-----------|-----------|-----------|
| C | 1.429722  | 0.859676  | 0.044476  |
| O | 1.353310  | -0.313693 | 0.481459  |
| H | 1.653978  | 1.619006  | 0.779319  |
| H | 1.403403  | 1.020270  | -1.024383 |
| O | -0.751282 | 1.306011  | 0.025333  |
| O | -1.212820 | 0.234821  | -0.567589 |
| C | -1.782560 | -0.677144 | 0.383923  |
| O | 1.084113  | -1.276785 | -0.426116 |
| H | -2.030538 | -1.569566 | -0.181538 |
| H | -1.042325 | -0.898959 | 1.147087  |
| H | -2.669459 | -0.215537 | 0.814131  |

#### M1a

|   |           |           |           |
|---|-----------|-----------|-----------|
| C | -0.782419 | 0.985844  | 0.113081  |
| O | -1.315238 | -0.154638 | -0.589179 |
| H | -1.254785 | 1.861401  | -0.327586 |
| H | -1.004701 | 0.846028  | 1.169244  |
| O | 0.564906  | 1.121507  | -0.128815 |
| O | 1.234890  | 0.134686  | 0.652009  |
| C | 1.870313  | -0.745037 | -0.257250 |
| O | -1.468538 | -1.179782 | 0.199567  |
| H | 2.412772  | -1.445239 | 0.375214  |
| H | 1.138031  | -1.276616 | -0.864738 |
| H | 2.567809  | -0.197818 | -0.891296 |

#### M1b

|   |           |           |           |
|---|-----------|-----------|-----------|
| C | 0.854037  | -0.959564 | 0.216190  |
| O | -0.332832 | -0.657938 | 0.838243  |
| O | 1.472648  | 0.211405  | -0.353491 |
| O | 1.922602  | 0.998062  | 0.581013  |
| H | 1.512687  | -1.355028 | 0.986181  |
| H | 0.714918  | -1.630694 | -0.629536 |
| O | -1.278210 | -0.364213 | -0.189867 |
| C | -1.693057 | 0.973442  | 0.015408  |
| H | -2.141148 | 1.086635  | 1.002252  |
| H | -2.441794 | 1.148468  | -0.754857 |
| H | -0.857907 | 1.663467  | -0.104201 |

#### TS5

|   |           |           |           |
|---|-----------|-----------|-----------|
| C | 0.869832  | -1.023824 | 0.234228  |
| O | -0.435105 | -0.914123 | 0.749110  |
| O | 1.267241  | 0.134385  | -0.445793 |
| O | 1.072424  | 1.236576  | 0.365718  |

|   |           |           |           |
|---|-----------|-----------|-----------|
| H | 1.481515  | -1.224496 | 1.115777  |
| H | 0.944628  | -1.809943 | -0.517964 |
| O | -1.224760 | -0.325645 | -0.283132 |
| C | -1.373678 | 0.993726  | 0.072482  |
| H | -1.781083 | 1.135617  | 1.072923  |
| H | -1.875555 | 1.518418  | -0.734261 |
| H | -0.130066 | 1.419289  | 0.214740  |

### M2

|   |           |           |           |
|---|-----------|-----------|-----------|
| C | 0.829138  | -0.940640 | 0.191544  |
| O | -0.395795 | -0.724615 | 0.840891  |
| O | 1.287493  | 0.171437  | -0.500310 |
| O | 1.573553  | 1.190892  | 0.443366  |
| H | 1.501294  | -1.221101 | 1.003734  |
| H | 0.737603  | -1.717327 | -0.568132 |
| O | -1.356063 | -0.441209 | -0.172816 |
| C | -1.730884 | 0.852684  | -0.047325 |
| H | -1.821377 | 1.238261  | 0.959301  |
| H | -2.405955 | 1.145563  | -0.836637 |
| H | 0.738860  | 1.682230  | 0.452267  |

### TS6

|   |           |           |           |
|---|-----------|-----------|-----------|
| C | -0.598455 | 0.920314  | -0.007704 |
| O | 0.456647  | 0.245257  | 0.615538  |
| O | -1.483780 | 0.064579  | -0.652069 |
| O | -2.162090 | -0.681717 | 0.345733  |
| H | -1.089208 | 1.450964  | 0.808635  |
| H | -0.228733 | 1.586220  | -0.787167 |
| O | 1.295328  | -0.259627 | -0.430369 |
| C | 2.574737  | -0.250672 | 0.011787  |
| H | 2.756476  | 0.138149  | 0.999204  |
| H | 3.190353  | -0.999215 | -0.460590 |
| H | -1.566510 | -1.431168 | 0.478247  |

### CP1

|   |           |           |           |
|---|-----------|-----------|-----------|
| C | -0.613583 | 0.536608  | 0.018177  |
| O | -0.008110 | -0.046552 | 1.063440  |
| O | -1.715019 | -0.161079 | -0.494392 |
| O | -2.728296 | -0.132586 | 0.499178  |
| H | -0.915988 | 1.549297  | 0.335916  |
| H | 0.104533  | 0.628417  | -0.812008 |
| O | 2.382480  | 0.442082  | -1.099299 |
| C | 2.908712  | -0.145568 | -0.196094 |
| H | 2.339853  | -0.465894 | 0.691420  |
| H | 3.984268  | -0.385333 | -0.219627 |
| H | -2.526202 | -0.924474 | 1.014367  |

### H<sub>2</sub>CO

|   |           |           |          |
|---|-----------|-----------|----------|
| C | -0.001136 | 0.000634  | 0.003418 |
| O | 0.001560  | -0.000203 | 1.199260 |

|   |           |           |           |
|---|-----------|-----------|-----------|
| H | 0.936988  | -0.000215 | -0.576426 |
| H | -0.940391 | 0.002247  | -0.574635 |

### CH<sub>2</sub>(O)OOH

|   |           |           |           |
|---|-----------|-----------|-----------|
| C | 0.688035  | 0.454451  | 0.228626  |
| O | 1.309974  | -0.671362 | -0.155097 |
| H | 0.616877  | 0.417282  | 1.329287  |
| H | 1.276174  | 1.336957  | -0.058968 |
| O | -0.578948 | 0.658240  | -0.333588 |
| O | -1.430557 | -0.351565 | 0.181861  |
| H | -1.298377 | -1.070235 | -0.450580 |

### Optimized at M05/aug-cc-pVTZ

#### H<sub>2</sub>COO

|   |           |           |          |
|---|-----------|-----------|----------|
| O | -1.163987 | -0.202695 | 0.000000 |
| O | -0.024404 | 0.448947  | 0.000000 |
| C | 1.062114  | -0.179485 | 0.000000 |
| H | 1.050251  | -1.262722 | 0.000000 |
| H | 1.948499  | 0.437792  | 0.000000 |

#### CH<sub>3</sub>OO

|   |           |           |           |
|---|-----------|-----------|-----------|
| O | -1.207907 | 0.076829  | 0.000000  |
| O | -0.009667 | 0.559372  | 0.000000  |
| C | 0.989817  | -0.480330 | 0.000000  |
| H | 1.945654  | 0.036118  | 0.000000  |
| H | 0.872732  | -1.087564 | 0.894779  |
| H | 0.872731  | -1.087564 | -0.894779 |

#### CR1

|   |           |           |           |
|---|-----------|-----------|-----------|
| C | -1.705039 | -0.861399 | -0.054310 |
| O | -1.839844 | 0.286963  | 0.422754  |
| H | -2.068777 | -1.664420 | 0.570634  |
| H | -1.249651 | -0.991079 | -1.027777 |
| O | 1.143238  | -1.296404 | -0.093972 |
| O | 2.044810  | -0.424906 | -0.391617 |
| C | 1.795791  | 0.865423  | 0.219955  |
| O | -1.402969 | 1.334941  | -0.265186 |
| H | 2.572895  | 1.515322  | -0.171319 |
| H | 0.800012  | 1.209577  | -0.057707 |
| H | 1.886297  | 0.758494  | 1.299219  |

#### TS1

|   |           |           |           |
|---|-----------|-----------|-----------|
| C | 1.463361  | 0.894577  | 0.020609  |
| 8 | 1.506017  | -0.279909 | 0.503423  |
| H | 1.636113  | 1.685755  | 0.733634  |
| H | 1.440561  | 1.023395  | -1.051472 |
| O | -0.742939 | 1.253026  | 0.033560  |
| O | -1.283012 | 0.226555  | -0.561929 |
| C | -1.877089 | -0.688839 | 0.379780  |

|   |           |           |           |
|---|-----------|-----------|-----------|
| O | 1.349944  | -1.295899 | -0.333665 |
| H | -2.283694 | -1.492710 | -0.226161 |
| H | -1.110803 | -1.065996 | 1.051239  |
| H | -2.662915 | -0.171856 | 0.927084  |

#### M1a

|   |           |           |           |
|---|-----------|-----------|-----------|
| C | -0.789902 | 0.970286  | 0.120366  |
| O | -1.400242 | -0.159909 | -0.571191 |
| H | -1.239173 | 1.863147  | -0.310903 |
| H | -1.003320 | 0.841793  | 1.179757  |
| O | 0.547221  | 1.065638  | -0.159941 |
| O | 1.238706  | 0.100478  | 0.620233  |
| C | 1.946499  | -0.738378 | -0.268773 |
| 8 | -1.752416 | -1.107216 | 0.238537  |
| H | 2.497004  | -1.411917 | 0.385317  |
| H | 1.271068  | -1.309655 | -0.907041 |
| H | 2.647596  | -0.163930 | -0.876110 |

#### M1b

|   |           |           |           |
|---|-----------|-----------|-----------|
| C | 0.863645  | -0.950082 | 0.218693  |
| O | -0.314250 | -0.605161 | 0.824882  |
| O | 1.574093  | 0.191665  | -0.342661 |
| O | 2.101326  | 0.929161  | 0.582640  |
| H | 1.486987  | -1.384412 | 0.996733  |
| H | 0.716887  | -1.607536 | -0.636497 |
| O | -1.275465 | -0.338416 | -0.187912 |
| C | -1.749780 | 0.976164  | 0.016138  |
| H | -2.204606 | 1.081182  | 1.002428  |
| H | -2.509762 | 1.107150  | -0.752300 |
| H | -0.957131 | 1.714326  | -0.114810 |

#### TS5

|   |           |           |           |
|---|-----------|-----------|-----------|
| C | 0.871523  | -1.025163 | 0.235856  |
| O | -0.437234 | -0.920725 | 0.740112  |
| O | 1.291799  | 0.138039  | -0.430190 |
| O | 1.074877  | 1.243582  | 0.347989  |
| H | 1.465134  | -1.248383 | 1.126022  |
| H | 0.963347  | -1.801251 | -0.526608 |
| O | -1.230576 | -0.320701 | -0.276883 |
| C | -1.382178 | 0.997649  | 0.075035  |
| H | -1.777264 | 1.152967  | 1.079257  |
| H | -1.899660 | 1.509347  | -0.730376 |
| H | -0.124376 | 1.414618  | 0.203615  |

#### TS6

|   |           |           |           |
|---|-----------|-----------|-----------|
| C | -0.579931 | 0.884336  | -0.013898 |
| O | 0.472991  | 0.218435  | 0.623820  |
| O | -1.500429 | 0.047120  | -0.635262 |
| O | -2.246163 | -0.627484 | 0.352468  |
| H | -1.043984 | 1.451454  | 0.794012  |

|   |           |           |           |
|---|-----------|-----------|-----------|
| H | -0.212867 | 1.525576  | -0.815296 |
| O | 1.320479  | -0.318917 | -0.382214 |
| C | 2.610404  | -0.202913 | 0.018991  |
| H | 2.799477  | 0.105339  | 1.033149  |
| H | 3.261201  | -0.862317 | -0.532600 |
| H | -1.736414 | -1.437545 | 0.478073  |

### CP1

|   |           |           |           |
|---|-----------|-----------|-----------|
| C | -0.565823 | 0.631049  | 0.116724  |
| O | -0.008168 | 0.237289  | 1.251912  |
| O | -1.504938 | -0.241035 | -0.465385 |
| O | -2.641946 | -0.297238 | 0.364791  |
| H | -1.023895 | 1.624832  | 0.284609  |
| H | 0.213181  | 0.763484  | -0.659749 |
| O | 2.362277  | 0.449592  | -1.164376 |
| C | 2.795162  | -0.202067 | -0.257279 |
| H | 2.169225  | -0.497883 | 0.607700  |
| H | 3.847609  | -0.541877 | -0.232208 |
| H | -2.430036 | -1.031229 | 0.954338  |

### H<sub>2</sub>CO

|   |           |           |           |
|---|-----------|-----------|-----------|
| C | -0.000713 | 0.000593  | 0.010396  |
| O | 0.000881  | -0.000140 | 1.205701  |
| H | 0.934974  | -0.000228 | -0.583663 |
| H | -0.938120 | 0.002237  | -0.580817 |

### CH<sub>2</sub>(O)OOH

|   |           |           |           |
|---|-----------|-----------|-----------|
| C | 0.697971  | 0.439359  | 0.223358  |
| O | 1.337744  | -0.663445 | -0.138369 |
| H | 0.641578  | 0.424397  | 1.329936  |
| H | 1.261503  | 1.342979  | -0.060635 |
| O | -0.582222 | 0.644571  | -0.322549 |
| O | -1.446558 | -0.348872 | 0.172957  |
| H | -1.326837 | -1.065218 | -0.463155 |
